# Supplementary material
Source: PubMed Central journal article supplement (PMC2685688)

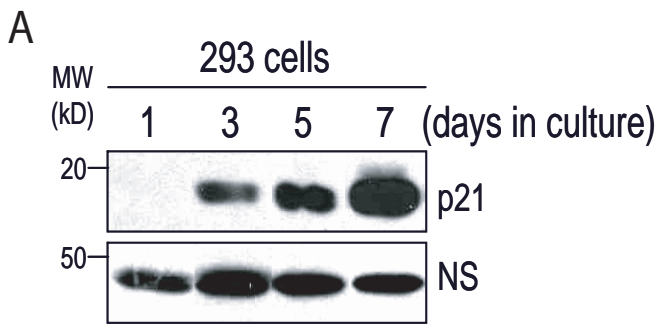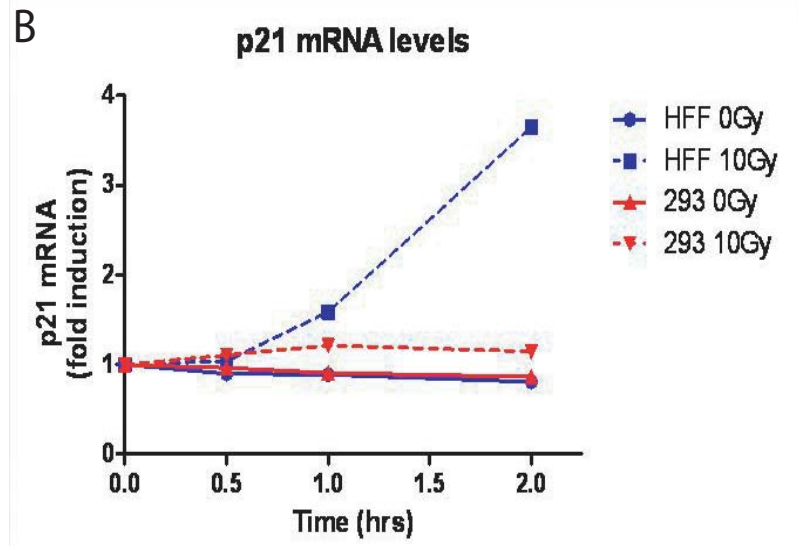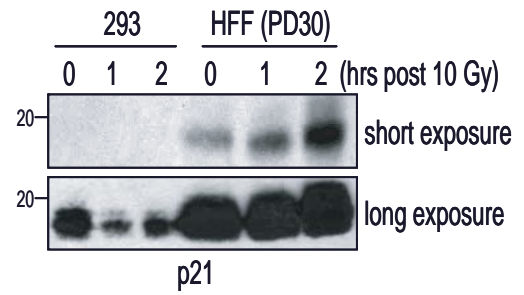

Supplement: M808810200_1.pdf [file M808810200_1.pdf]

**A**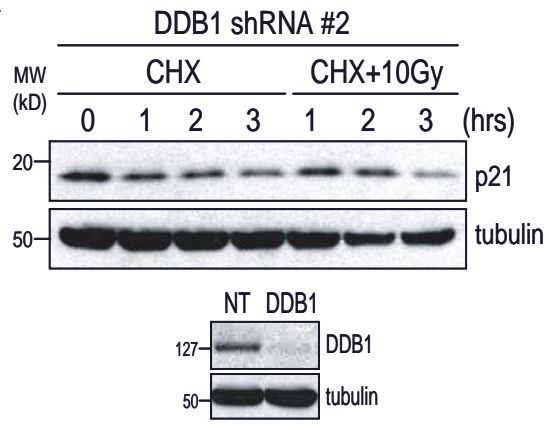**B**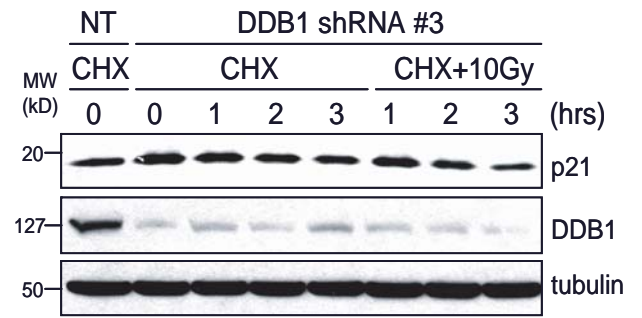

Supplement: M808810200_2.pdf [file M808810200_2.pdf]
